# Supplementary material for: Exploring the oncostatin M (OSM) feed-forward signaling of glioblastoma via STAT3 in pan-cancer analysis
Source: PubMed Central journal article supplement (PMC8549168; doi:10.1186/s12935-021-02260-9), 2021-10-26

Fig. S1

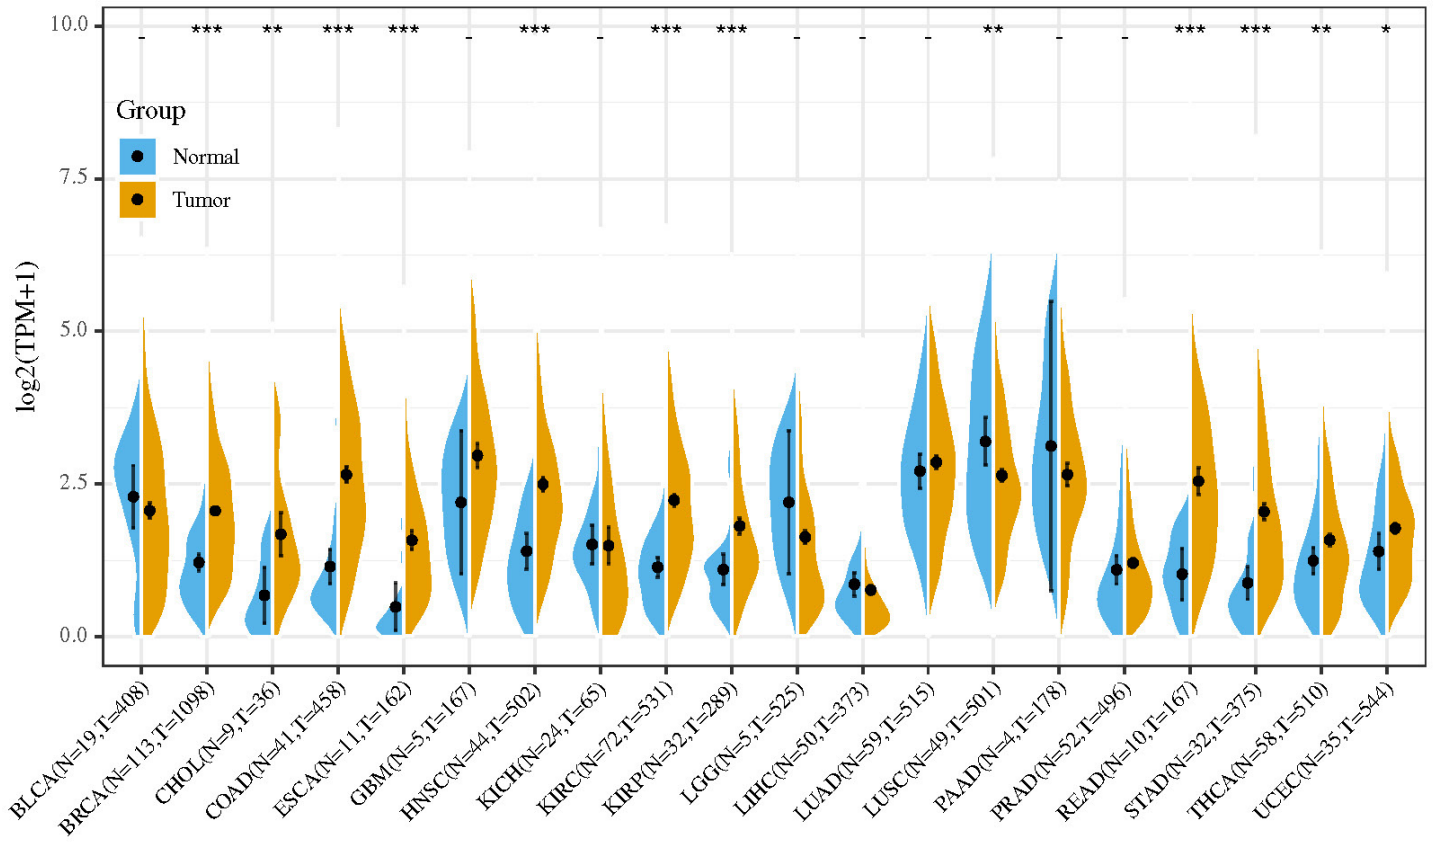

Fig. S2

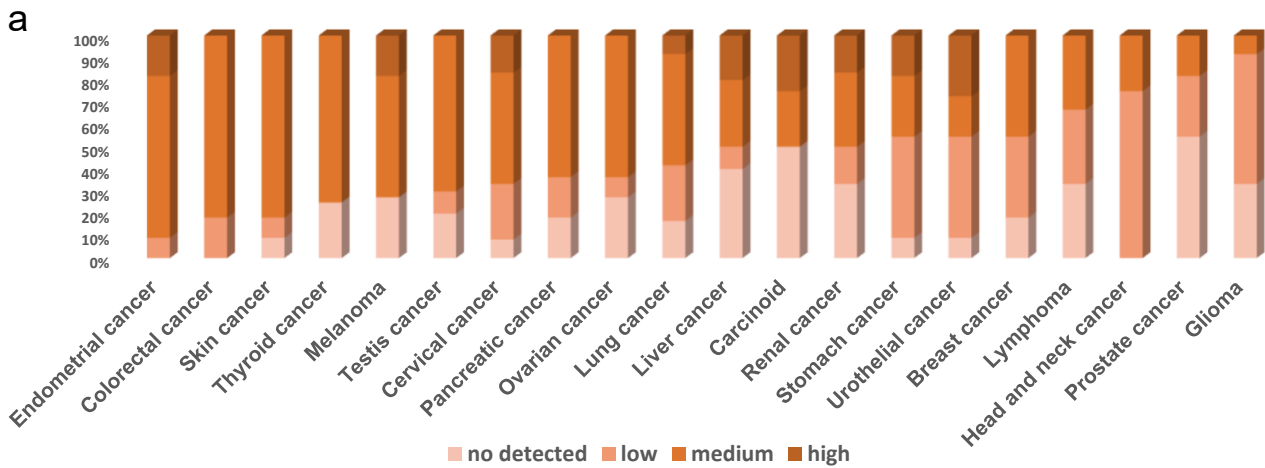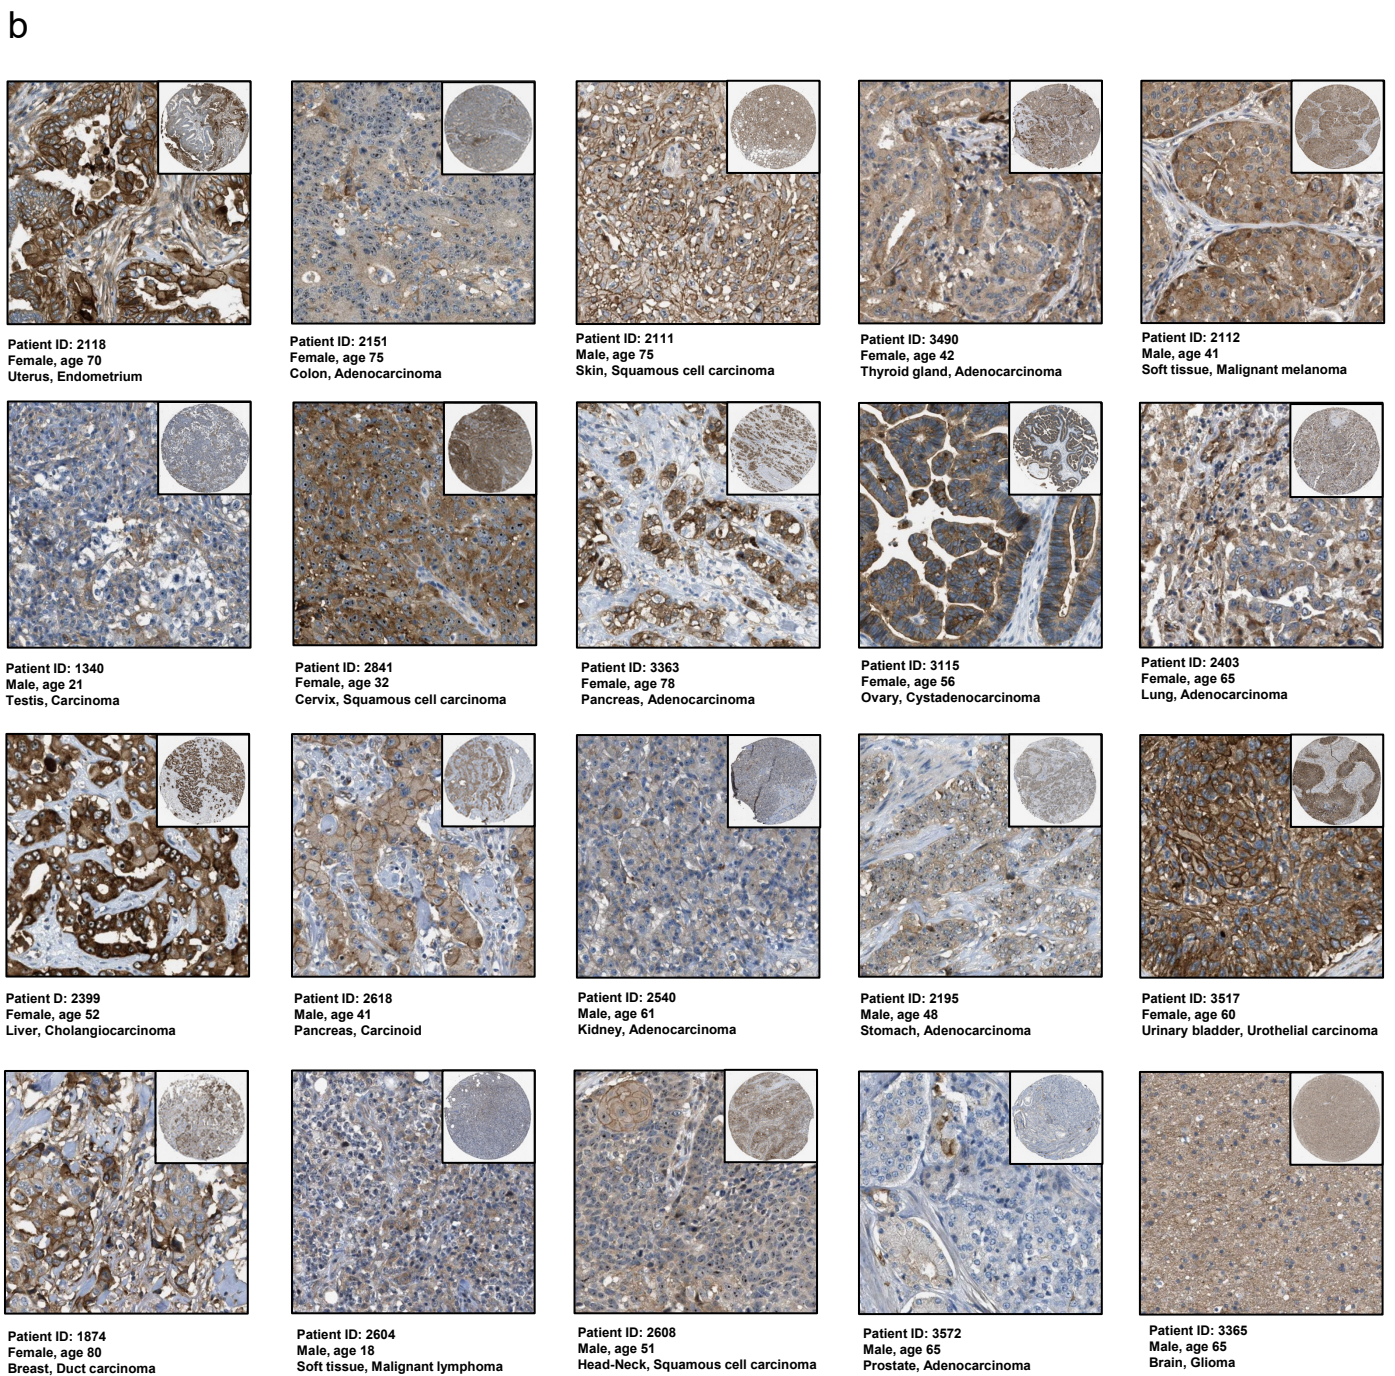

Fig. S3

ESTIMATE Score

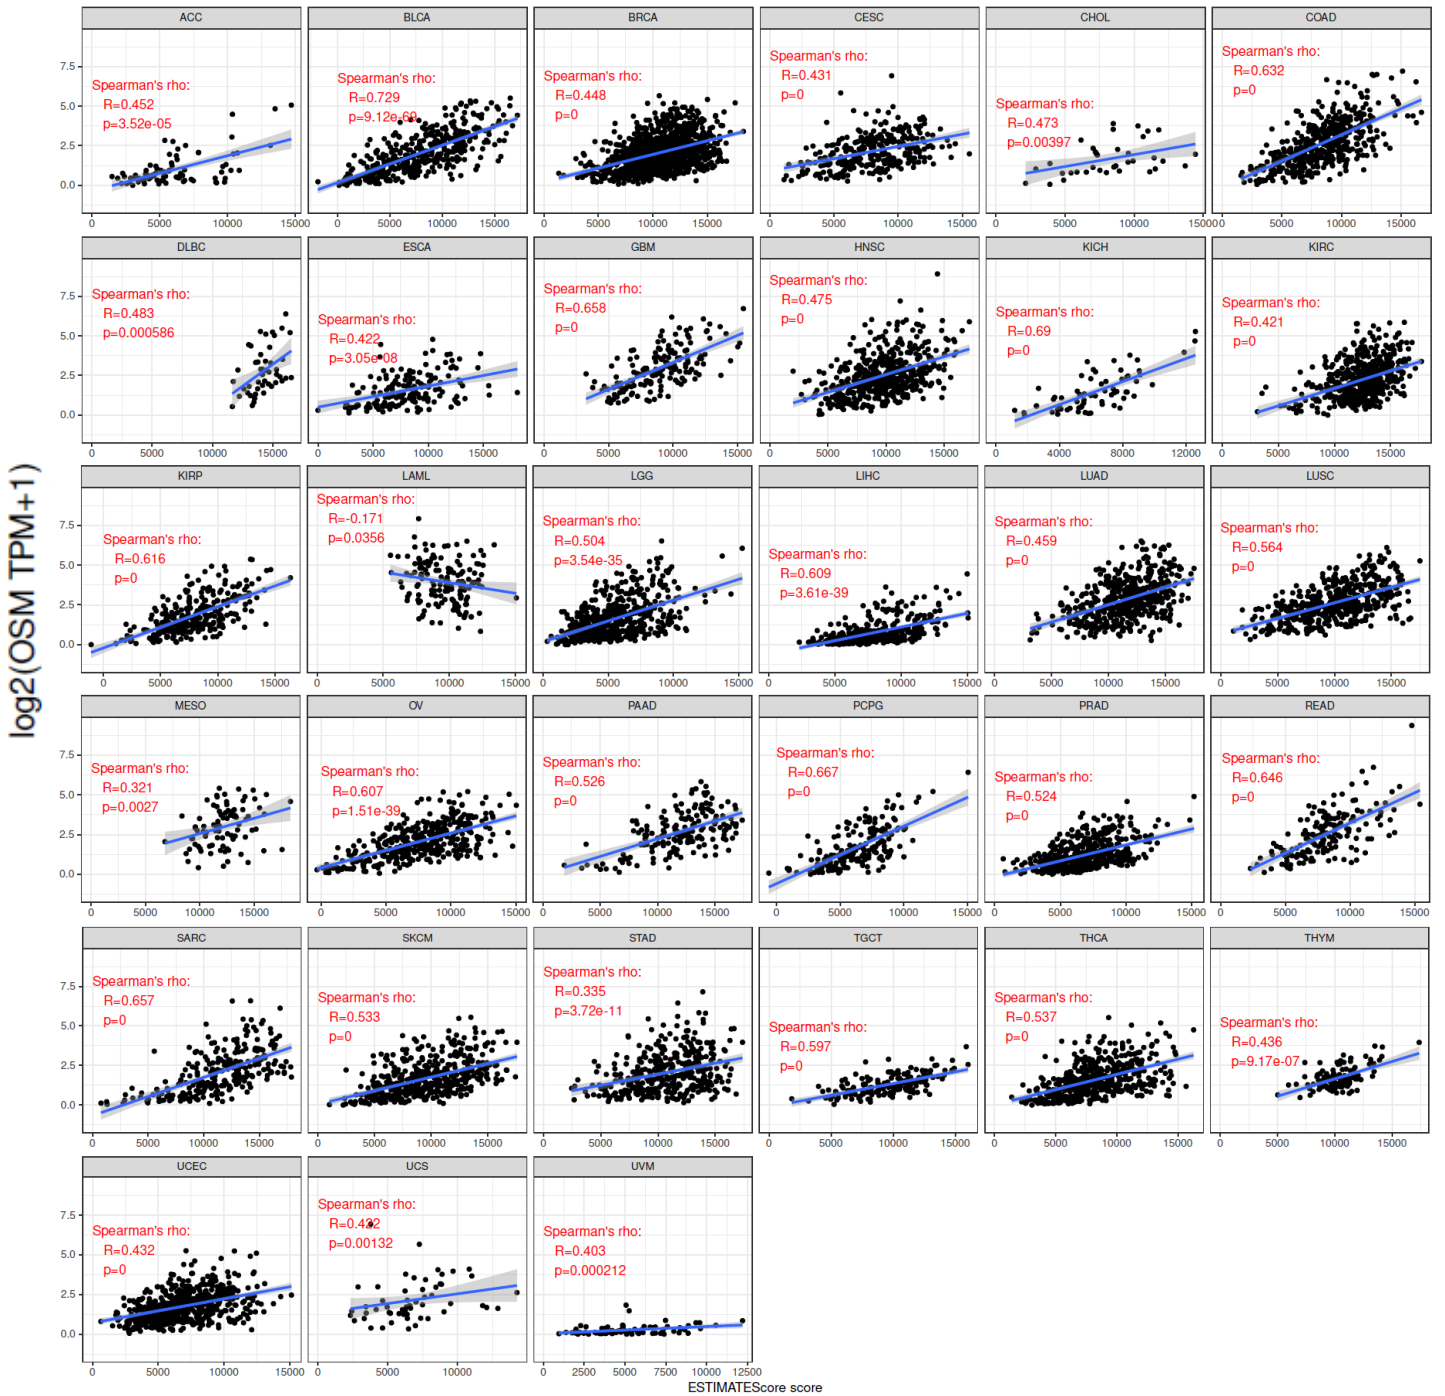

Fig. S4

Stromal Score

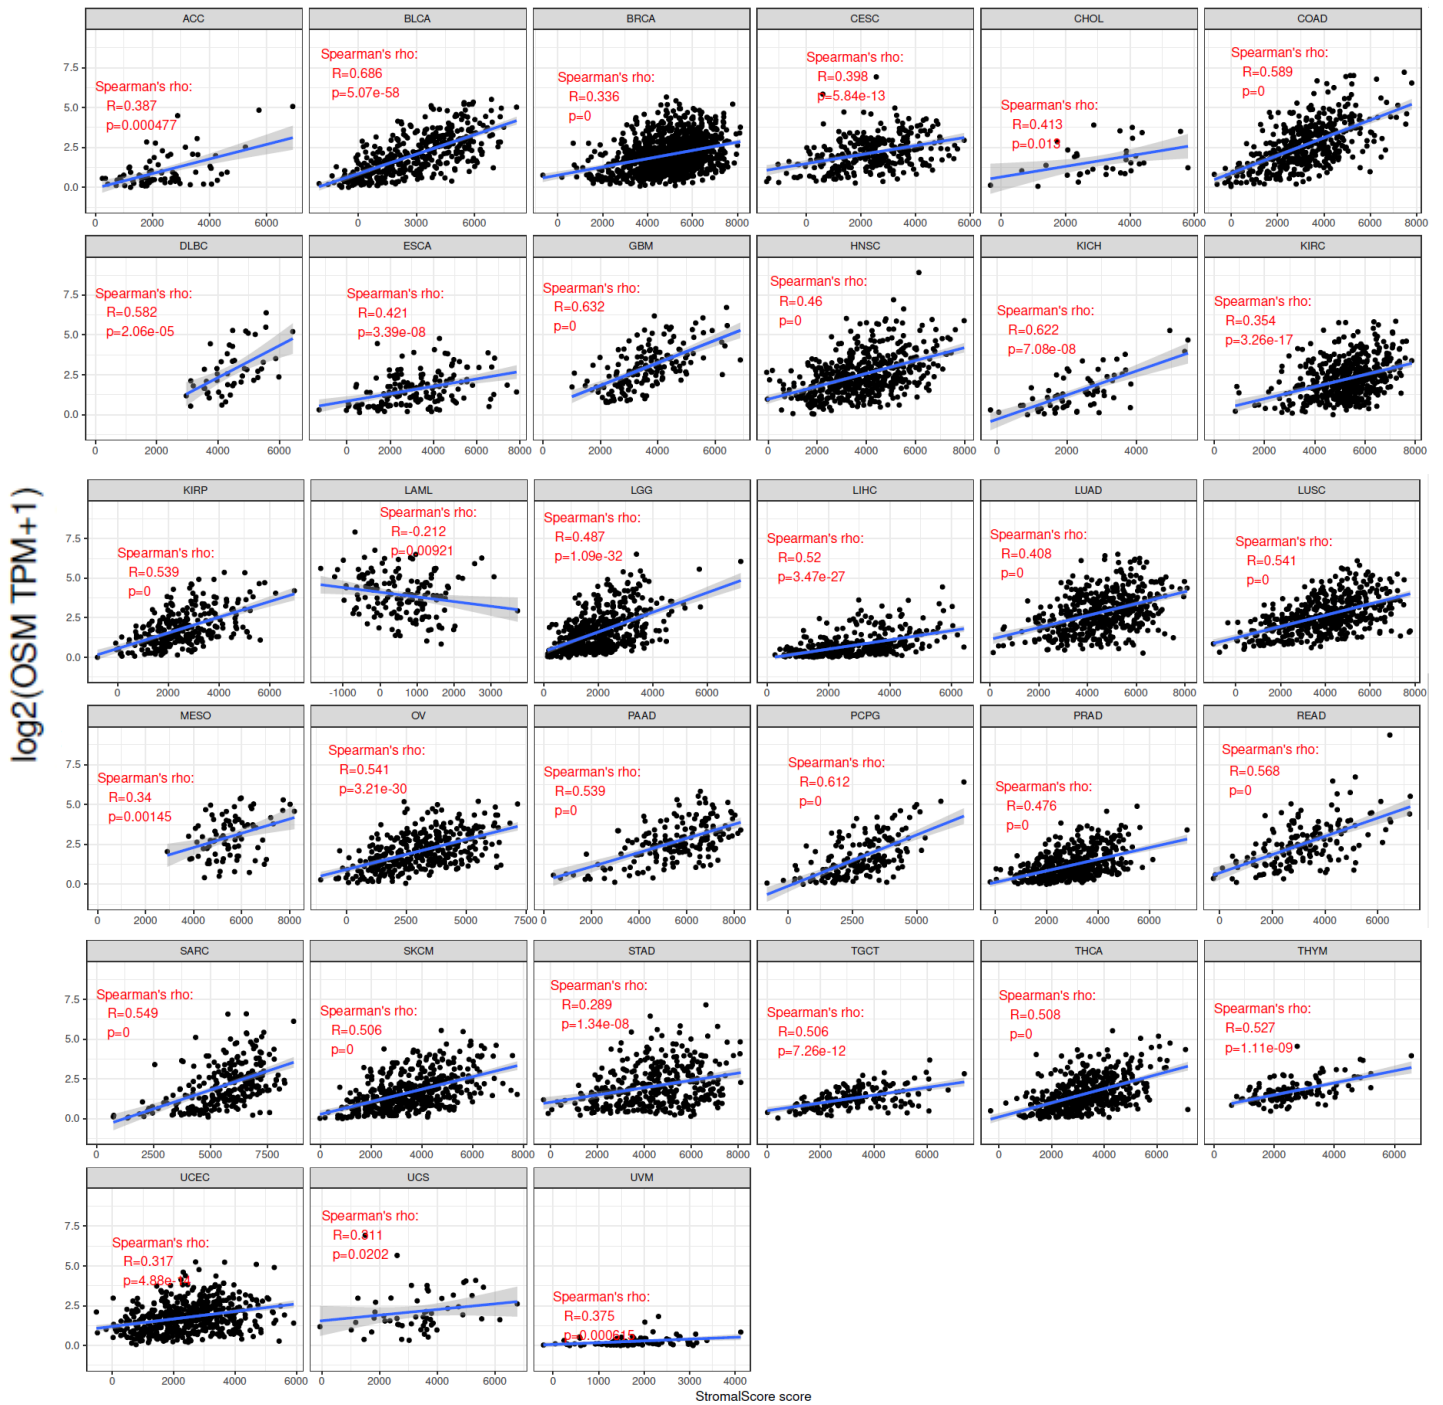

Fig. S5

Immune Score

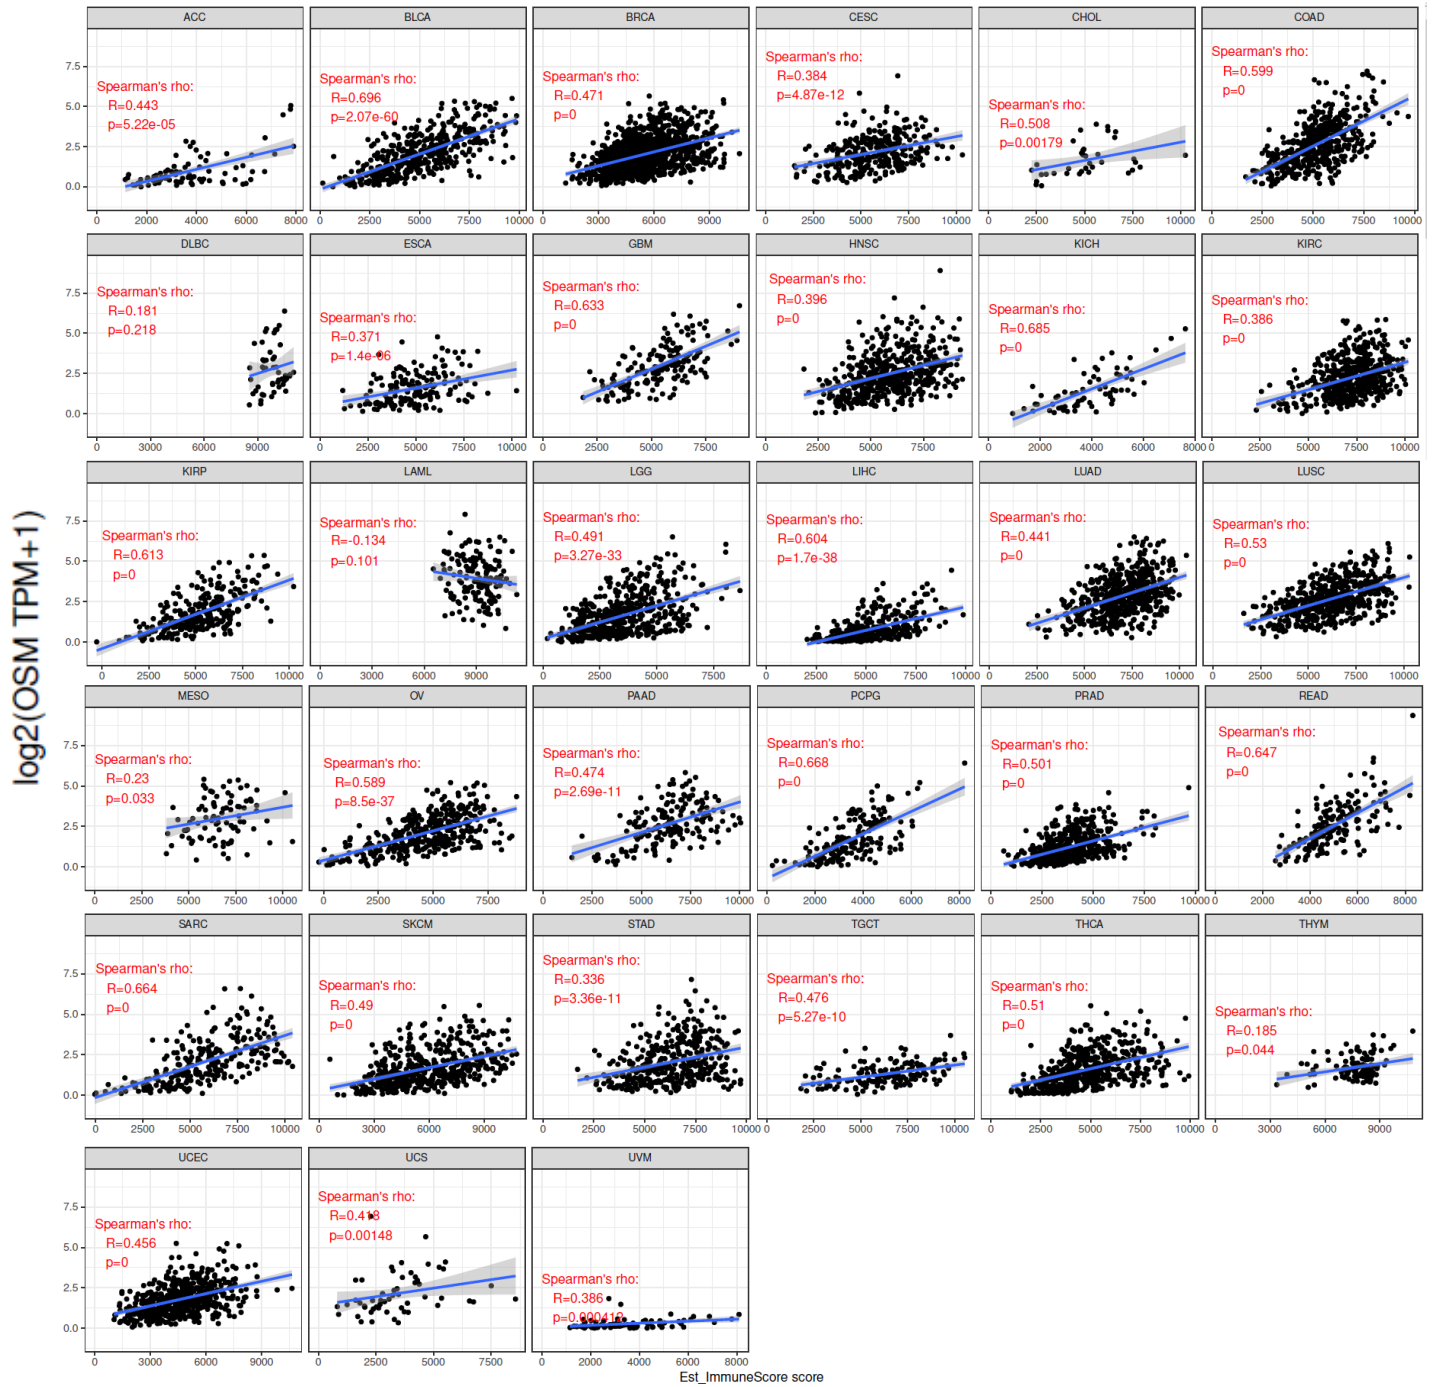

Fig. S6

a

**Growth Factors**

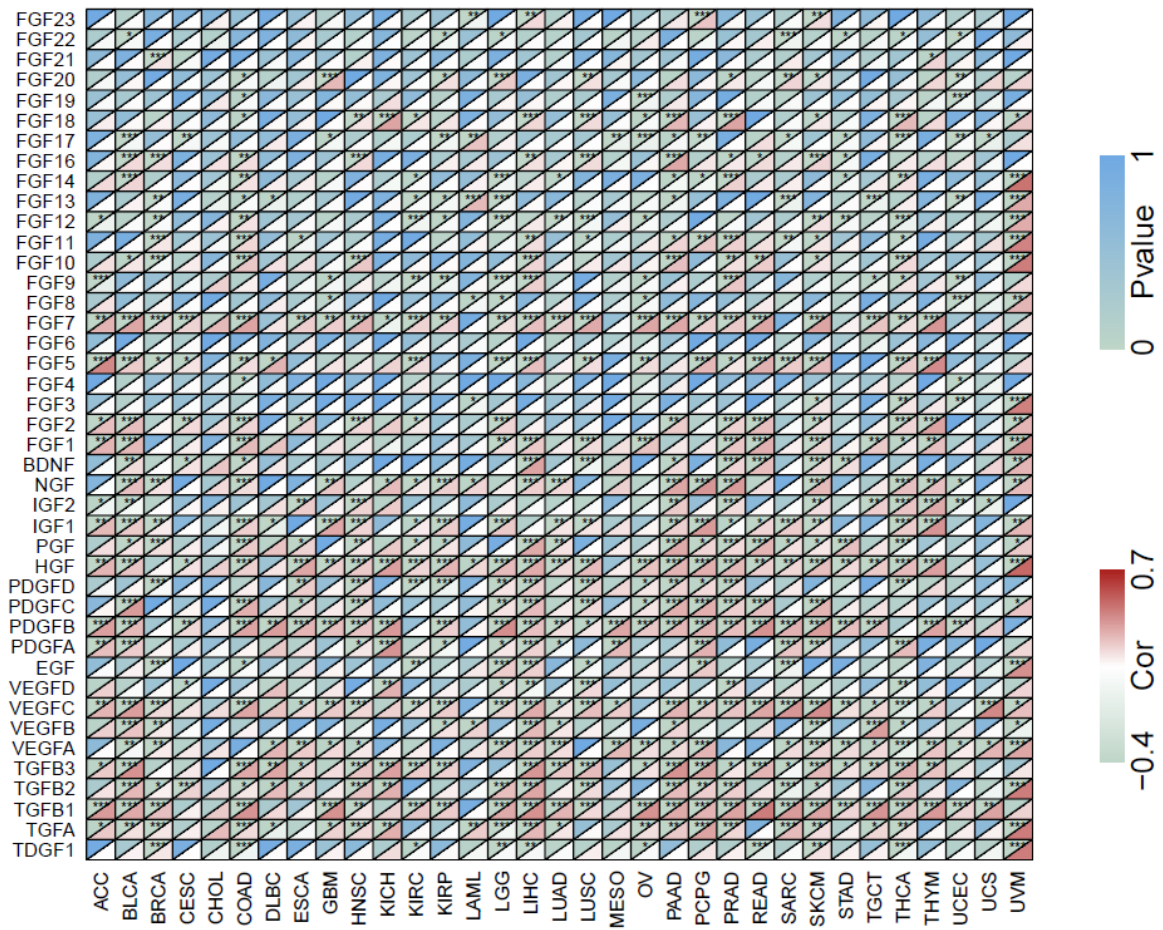

**Cytokines**

b

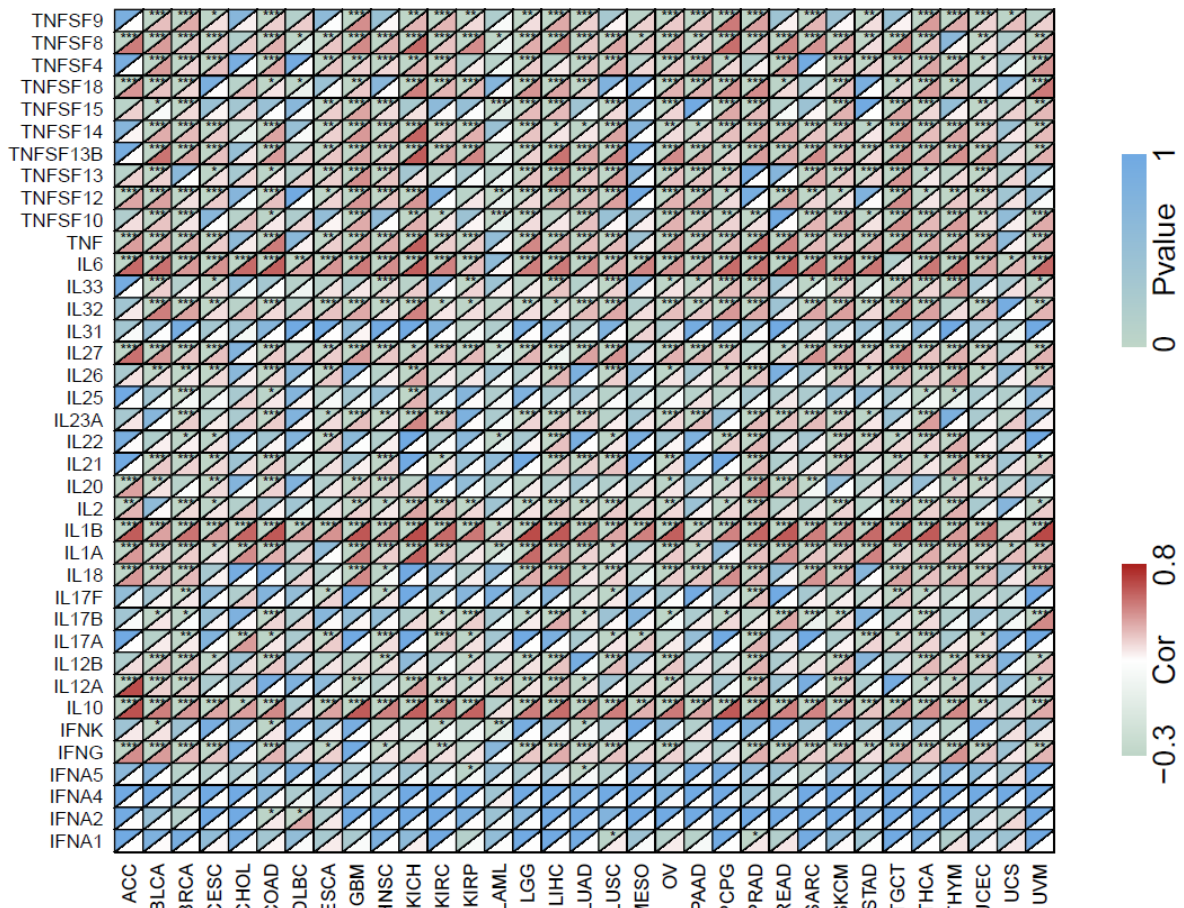

Fig. S7

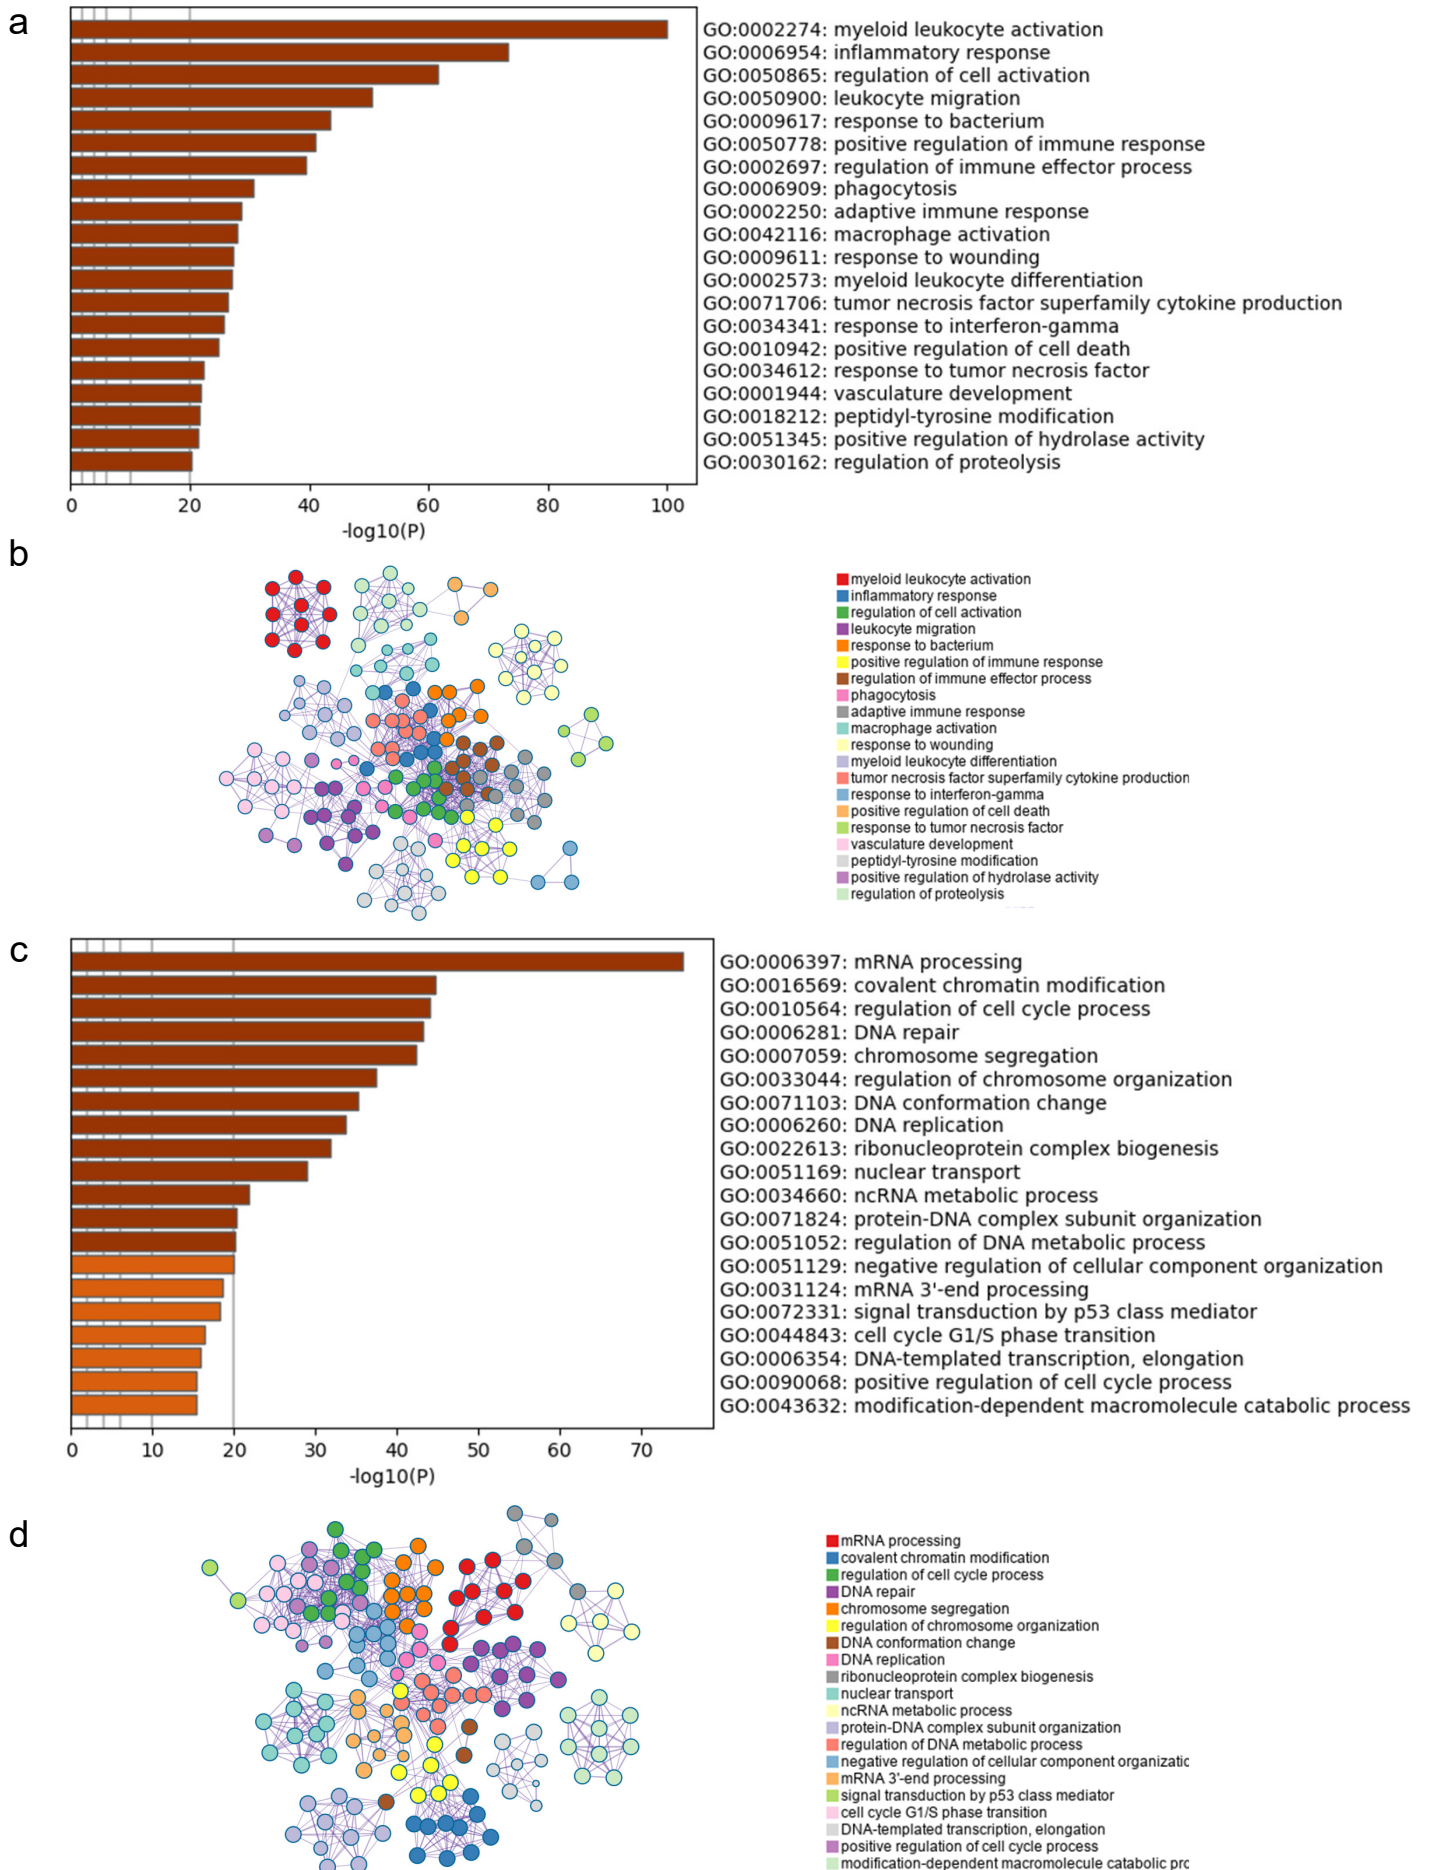

Fig. S8

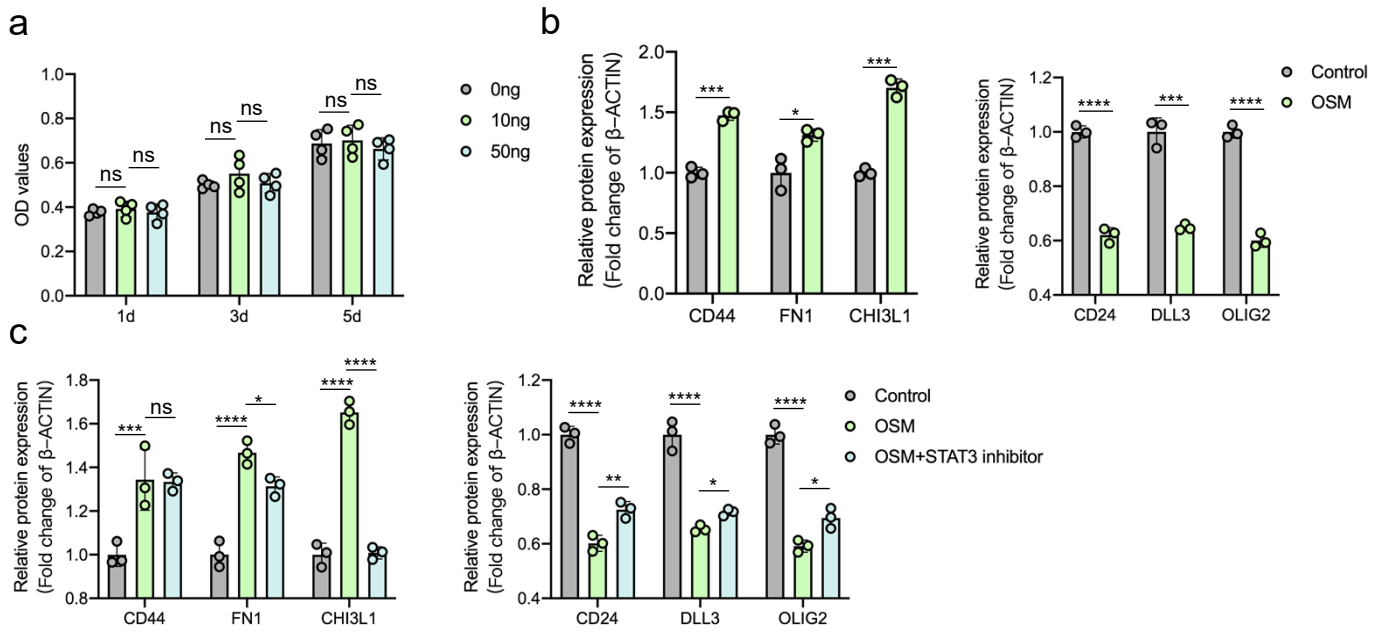

Supplement: 12935_2021_2260_MOESM1_ESM.pdf [file 12935_2021_2260_MOESM1_ESM.pdf]
